# Supplementary material for: Activation of AMPK/miR-181b Axis Alleviates Endothelial Dysfunction and Vascular Inflammation in Diabetic Mice
Source: MDPI journal article supplement (doi:10.3390/antiox11061137), 2022-06-09
Supplement: s1 [file s1]

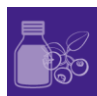

## Supplementary information

# Activation of AMPK/miR-181b Axis Alleviates Endothelial Dysfunction and Vascular Inflammation in Diabetic Mice

Chak Kwong Cheng <sup>1,2,†</sup>, Wenbin Shang <sup>2,†</sup>, Jian Liu <sup>3</sup>, Wai San Cheang <sup>4</sup>, Yu Wang <sup>2</sup>, Li Xiang <sup>2</sup>, Chi Wai Lau <sup>2</sup>, Jiang-Yun Luo <sup>2</sup>, Chi Fai Ng <sup>5</sup>, Yu Huang <sup>1,2,\*</sup> and Li Wang <sup>1,2,\*</sup>

<sup>1</sup> Department of Biomedical Sciences, City University of Hong Kong, Hong Kong 999077, China; superandy333@gmail.com (C.K.C.)

<sup>2</sup> School of Biomedical Sciences, The Chinese University of Hong Kong, Hong Kong 999077, China; superandy333@gmail.com (C.K.C.); wenbinmedical@gmail.com (W.S.); wangyu.hmu@gmail.com (Y.W.); xiangli@hkbu.edu.hk (L.X.); chiwailau@cuhk.edu.hk (C.W.L.); luojiangyun1985@gmail.com (J.-Y.L.)

<sup>3</sup> Department of Integration of Chinese and Western Medicine, School of Basic Medical Sciences, Peking University, Beijing 100871, China; liujianpku@bjmu.edu.cn (J.L.)

<sup>4</sup> State Key Laboratory of Quality Research in Chinese Medicine, Institute of Chinese Medical Sciences, University of Macau, Zhuhai 519000, China; annacheang@um.edu.mo (W.S.C.)

<sup>5</sup> Department of Surgery, The Chinese University of Hong Kong, Hong Kong 999077, China; ngcf@surgery.cuhk.edu.hk (C.F.N.)

\* Correspondence: yu.huang@cityu.edu.hk; Tel.: +852-3442-7746 (Y.H.); li.wang@cityu.edu.hk; Tel.: +852-3442-9187 (L.W.)

† Chak Kwong Cheng and Wenbin Shang contribute equally to this study.

## Supplementary Materials

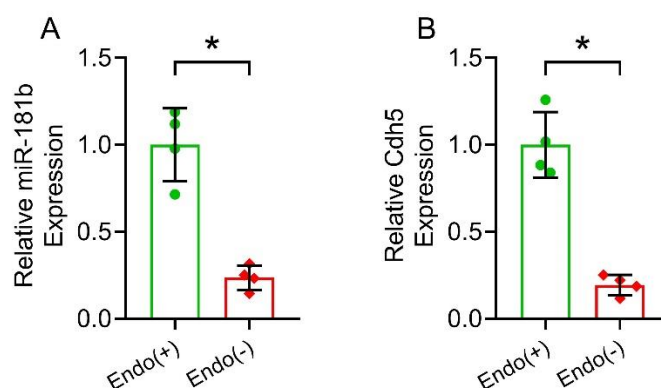

**Figure S1.** Expression of miR-181b and Cdh5 in aortas of C57BL/6 mice upon endothelium removal. Expression of (A) miR-181b and (B) endothelial cell-specific Cdh5 in mouse aortas. n=4 per group. Data are mean ± SD. \*p < 0.05 vs Endo(+) (unpaired t-test and nonparametric Mann-Whitney test).

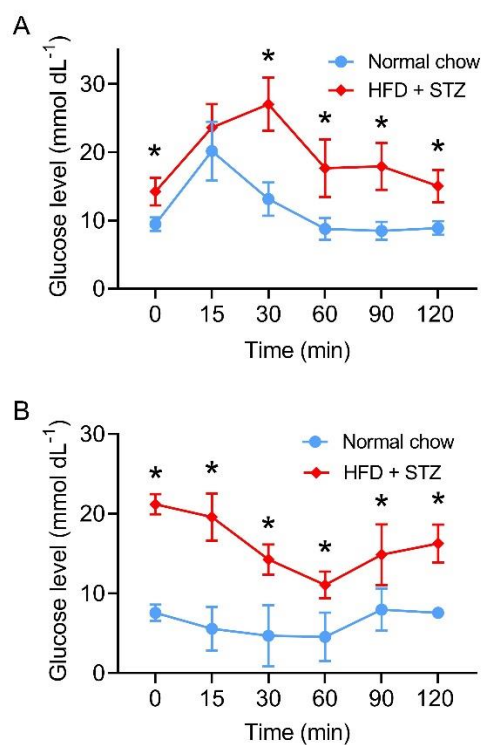

**Figure S2.** Glucose homeostasis of diabetic mice. **(A)** GTT, and **(B)** ITT of normal chow-fed mice and HFD/STZ-induced diabetic mice. n=10 per group. Data are mean  $\pm$  SD. \*p < 0.05 vs Normal chow (unpaired t-test and nonparametric Mann-Whitney test).
